# Supplementary material for: Synthesis and degradable properties of cycloaliphatic epoxy resin from renewable biomass-based furfural
Source: Royal Society of Chemistry journal article supplement (doi:10.1039/c5ra18658g), 2015-01-01
Supplement: c5ra18658g1.pdf [file c5ra18658g1.pdf]

## Supporting Information

### Synthesis and degradable property of cycloaliphatic epoxy resin from renewable biomass-based furfural

Linni Zhao, Lin Zhang, and Zhonggang Wang\*<sup>a</sup>

*State Key Laboratory of Fine Chemicals, Department of Polymer Science and Materials, School of Chemical Engineering, Dalian University of Technology, Dalian 116024, China*

Email: zgwang@dlut.edu.cn

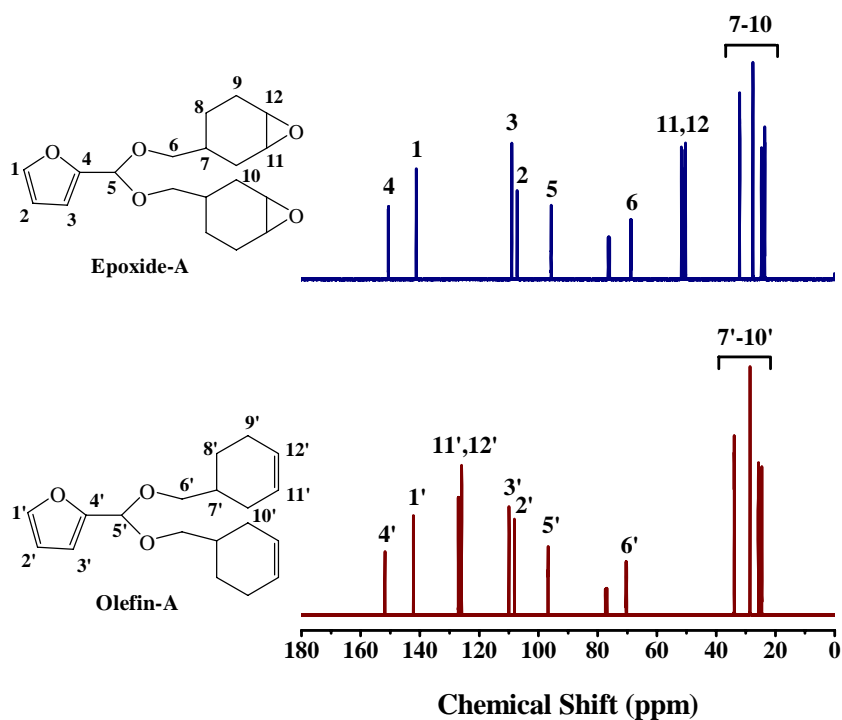

Fig. S1 <sup>13</sup>C NMR spectra of Olefin-A and Epoxide-A.

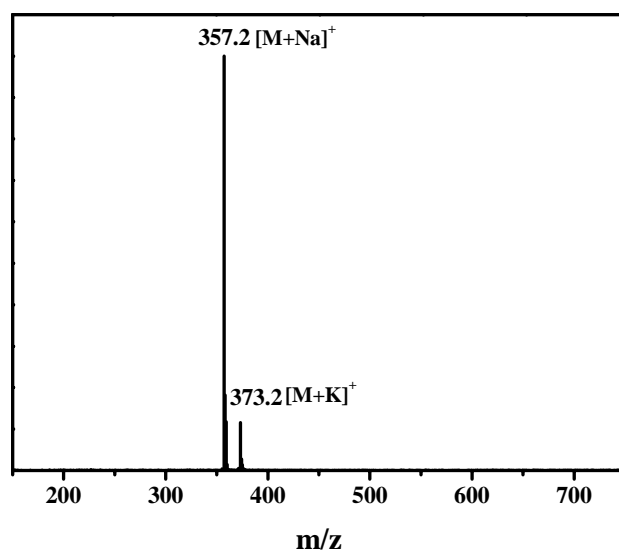

**Fig. S2** ESI-MS spectrum of Epoxide-A.
